# Supplementary material for: Multifunctional NiO/Ti3+–TiO2 for concurrent water reduction and glycerol oxidation to value added products by sunlight driven photocatalysis
Source: Royal Society of Chemistry journal article supplement (doi:10.1039/d4ta06910b), 2024-11-25
Supplement: d4ta06910b1.pdf [file d4ta06910b1.pdf]

## Electronic Supplementary Information (ESI)

### Multifunctional NiO/Ti<sup>3+</sup>-TiO<sub>2</sub> for concurrent Water Reduction and Glycerol Oxidation to Value added products by Sunlight driven photocatalysis

Sivaraj Rajendran,<sup>a</sup> Simi Saju,<sup>a</sup> Sunesh S. Mani,<sup>a</sup> Anantha Krishnan Asoka,<sup>a</sup> Arindam Saha,<sup>b,c</sup> Pushkaran S. Arun,<sup>a</sup> Biplab Ghosh,<sup>d</sup> Thomas Mathew,<sup>a,\*</sup> and Chinnakonda S. Gopinath<sup>b,c,\*</sup>

<sup>a</sup> Department of Chemistry, St. John's College (Affil. University of Kerala), Anchal, Kerala – 691306, India, E-Mail: [thomasmathew@stjohns.ac.in](mailto:thomasmathew@stjohns.ac.in)

<sup>b</sup> Catalysis and Inorganic Chemistry Division, CSIR - National Chemical Laboratory, Dr. Homi Bhabha Road, Pune 411 008, India. E-mail: [cs.gopinath@ncl.res.in](mailto:cs.gopinath@ncl.res.in).

<sup>c</sup> Academy of Scientific and Innovative Research (AcSIR), Ghaziabad 201002, India

<sup>d</sup> Beamline Development & Application Section, Bhabha Atomic Research Center, Mumbai 400085, India.

#### Supplementary Text:

The spectra of all the catalyst materials were recorded in grazing in fluorescence mode while that of references (Ni foil and NiO) in transmission mode. In fluorescence mode, the sample is kept at 45° to the incident X-ray beam and a silicon drift detector kept in the horizontal plane at 90° to the incident X-ray beam were employed to measure the incident flux ( $I_0$ ) and fluorescence signal ( $I_f$ ) from the sample. Then the absorption coefficient ( $\mu$ ) is

obtained by using the relation  $\mu = \frac{I_f}{I_0}$

In transmission mode, three ionization chambers were used for measuring incident flux ( $I_0$ ), transmitted flux ( $I_t$ ) and the XAS spectrum of a reference metal foil for calibration. The absorption coefficient ( $\mu$ ) was obtained using the relation,  $I_t = I_0 e^{-\mu x}$ , where  $x$  is the thickness of the material. The beamline uses a double crystal monochromator (DCM) with an operating energy range of 4-25 keV. Data processing and analysis were carried out using different data analysis programs available in the Demeter software package. The Athena module was employed for background removal, pre-edge and post-edge corrections, normalization, Fourier transform, etc. Finally, the Artemis module was employed for fitting the experimental data (raw data) against the scattering paths generated from crystallographic NiTiO<sub>3</sub> data using the FEFF 6.0 code. The fitting window used for all fits is 1 to 3.4 Å, and we have also included background in the final fit.

**Table S1.** XPS parameters and porous characteristics obtained from N<sub>2</sub> adsorption-desorption analysis of TiO<sub>2</sub> and NiO/Ti<sup>3+</sup>-TiO<sub>2</sub> (NiT) photocatalysts. <sup>a</sup>(SOC) indicates spin-orbit coupling separation.

| Photocatalyst    | BE of O1s [eV]           | BE of Ni 2p <sub>3/2</sub> <sup>a</sup> (SOC)[eV] | BE of Ti 2p <sub>3/2</sub> <sup>a</sup> (SOC) [eV] | KE of Ni LMM [eV] | Auger parameter (α') | S <sub>BET</sub> [m <sup>2</sup> g <sup>-1</sup> ] | Pore size [nm] | V <sub>p</sub> [mLg <sup>-1</sup> ] |
|------------------|--------------------------|---------------------------------------------------|----------------------------------------------------|-------------------|----------------------|----------------------------------------------------|----------------|-------------------------------------|
| TiO <sub>2</sub> | 529.4, 530.36 and 532    | NA                                                | 458.5 (5.9)                                        | NA                | NA                   | 22.1                                               | 4.9            | 0.050                               |
| NiT-1            | 528.2, 529.65 and 530.35 | 855.50(17.8)                                      | 457.40, 458.4 (5.8,5.7)                            | 843.25            | 1698.7               | 24.1                                               | 5.6            | 0.052                               |
| NiT-2            | 528.2, 529.6 and 530.4   | 855.45(17.8)                                      | 457.20, 458.34 (5.9,5.8)                           | 843.52            | 1698.9               | NA                                                 | NA             | NA                                  |
| NiT-3            | 528.2, 529.6 and 530.45  | 855.40(18.1)                                      | 457.05, 458.38 (5.9,5.7)                           | 843.65            | 1699                 | 27.1                                               | 4.3            | 0.065                               |
| NiT-4            | 528.1., 529.7 and 530.7  | 855.30(17.8)                                      | 457.07, 458.42 (5.9,5.8)                           | 843.95            | 1699.2               | NA                                                 | NA             | NA                                  |

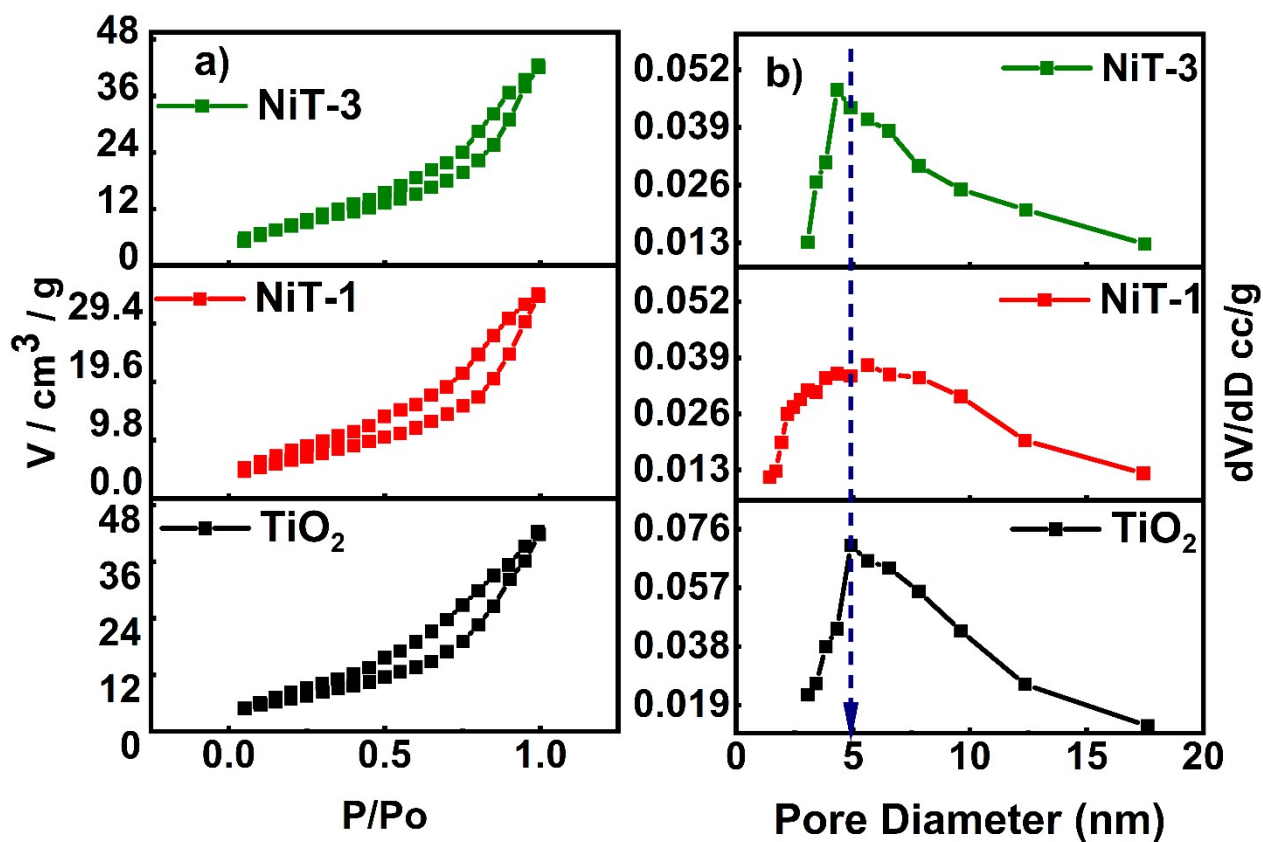

**Figure S1.** (a)  $N_2$  adsorption-desorption isotherms, and (b) pore size distribution pattern of  $TiO_2$ , and representative samples. Pore size distribution was estimated by the BJH model from  $N_2$  adsorption-desorption isotherm.

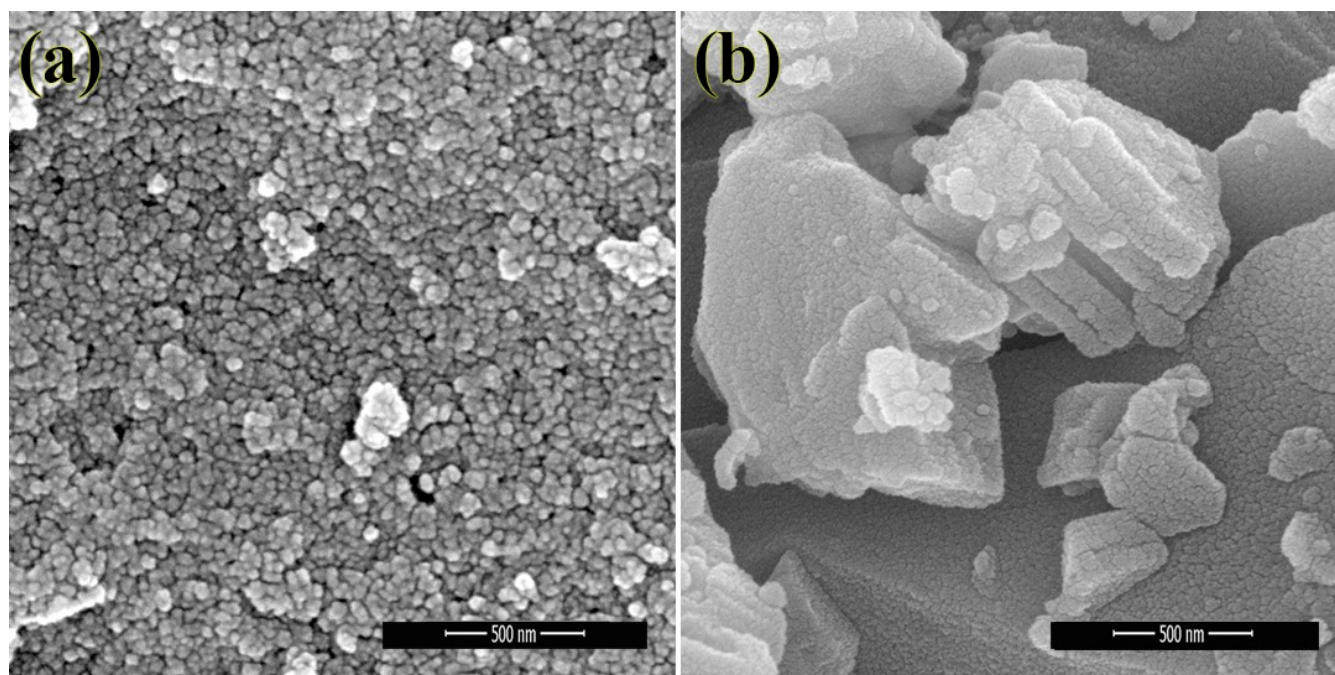

**Figure S2.** FESEM images of  $TiO_2$  and  $NiO/Ti^{3+}$ - $TiO_2$  nanocomposites: (a)  $TiO_2$  and (b) NiT-3.

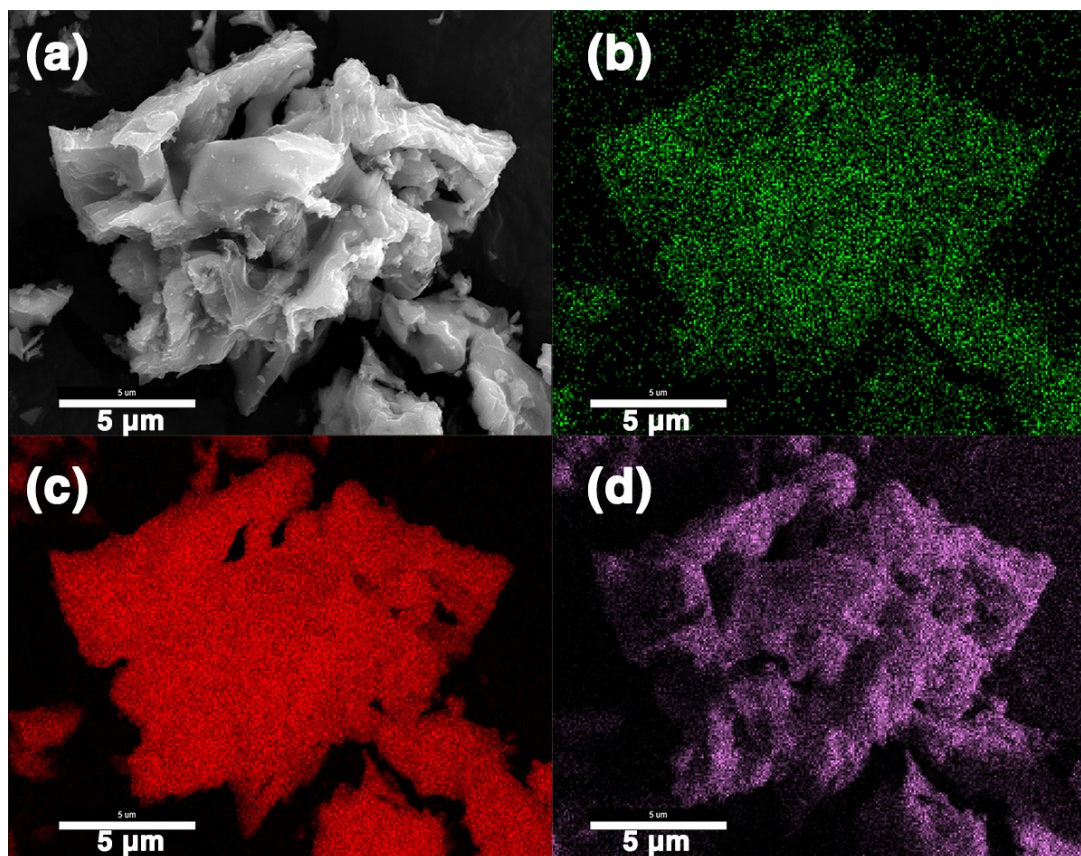

**Figure S3.** The EDS mapping of NiT-3: (a) FESEM, (b) Ni, (c) Ti, and (d) O, reveals uniform dispersion of Ni on the surface of TiO<sub>2</sub>.

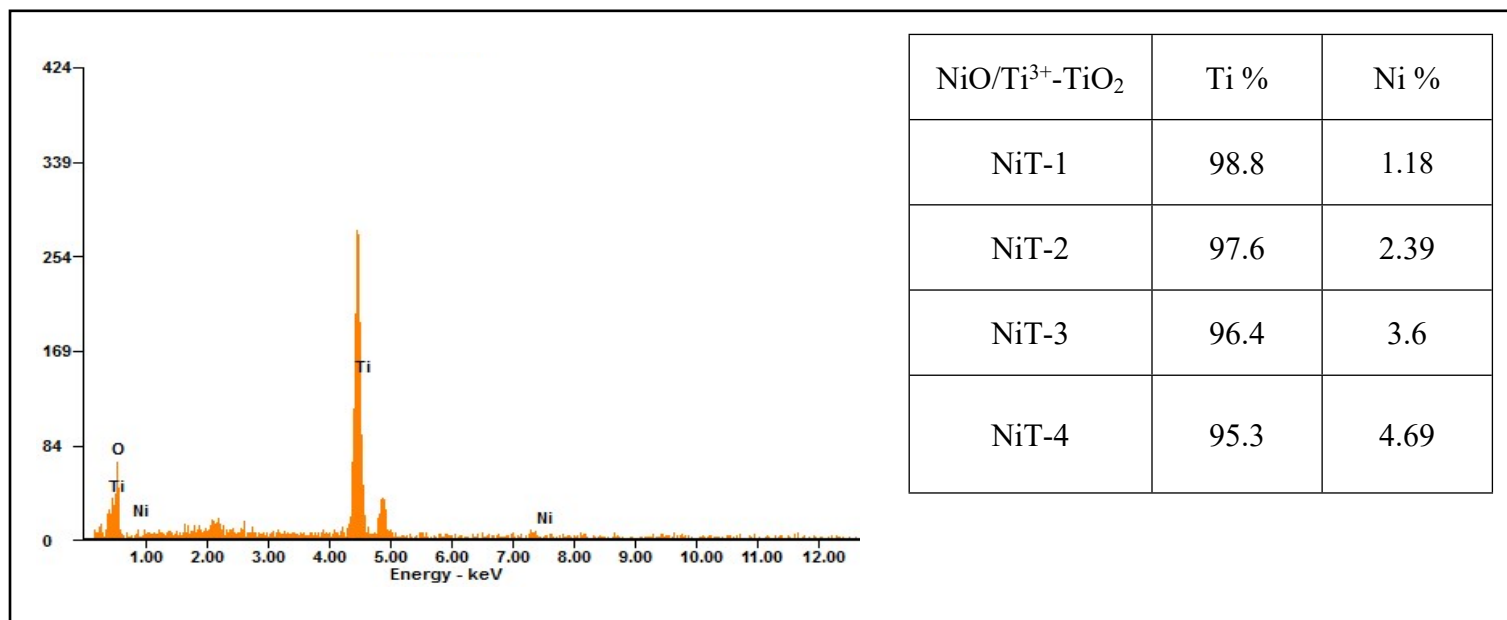

**Figure S4.** The energy dispersive X-ray analysis (EDX) was employed to confirm the elemental composition of all composites and the results for NiT-3 is shown. Table shows the atom percent of Ti and Ni in NiO/Ti<sup>3+</sup>-TiO<sub>2</sub> nanocomposites.

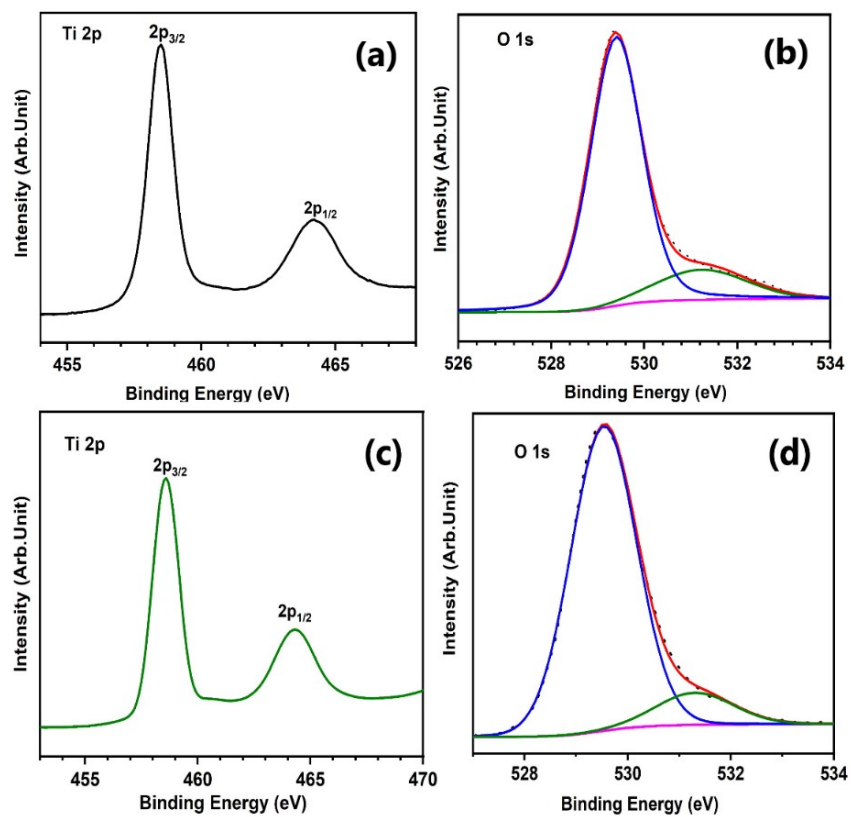

**Figure S5.** XPS spectra recorded for Ti 2p, and O 1s core level from  $\text{TiO}_2$  (a and b) and  $\text{NiO/TiO}_2$  composite catalyst prepared by conventional impregnation method (c and d).

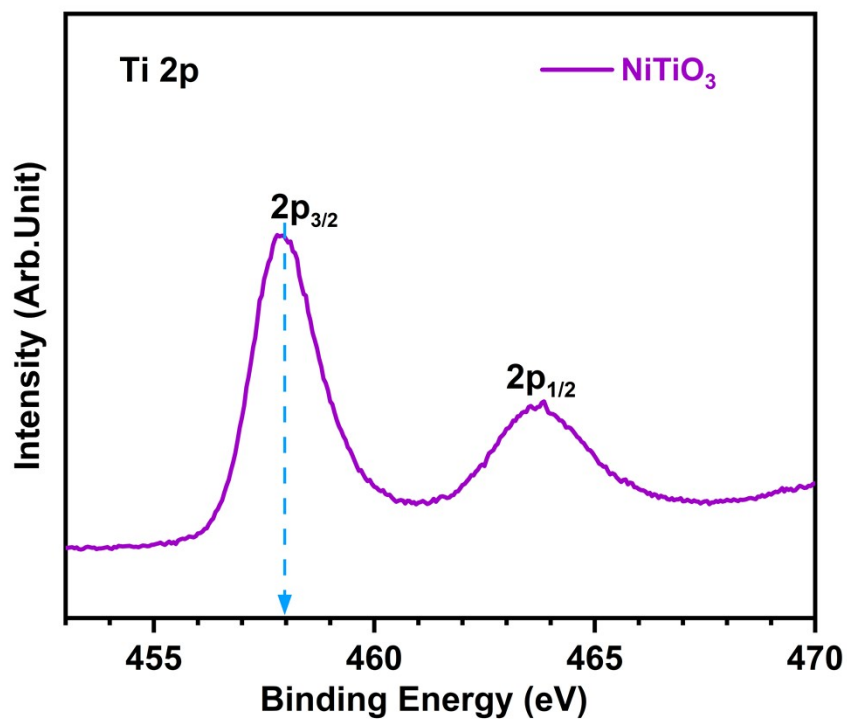

**Figure S6.** XPS spectra for Ti 2p core levels for NiTiO<sub>3</sub>.**Table S2.** Ni K-Edge Positions obtained for Ni foil, NiO standard and NiT nanocomposites

| Sample   | Edge position (eV) |
|----------|--------------------|
| Ni metal | 8333.1             |
| NiO      | 8345.5             |
| NiT-1    | 8345.0             |
| NiT-2    | 8345.1             |
| NiT-3    | 8344.6             |
| NiT-4    | 8344.4             |

**Table S3.** Structural parameters obtained from the Ni K-edge EXAFS fittings (coordination number (N), interatomic distance (R), Debye–Waller ( $\sigma^2$ ), edge-energy correlation ( $\Delta E$ )).

| <b>NiO</b>                  |          |              |              |              |                        |                 |
|-----------------------------|----------|--------------|--------------|--------------|------------------------|-----------------|
|                             | <b>N</b> | $S_0^2$      | $\Delta E_0$ | <b>R (Å)</b> | $\sigma^2(\text{Å}^2)$ | <b>R-factor</b> |
| [NiO] O1.1                  | 6        | 1            | -4.0271      | 2.06±0.09    | 0.006±0.001            | 0.008           |
| [NiO] Ni1.1                 | 12       | 1            | -4.0271      | 2.95±0.05    | 0.007±0.0003           |                 |
| <b>NiT-1</b>                |          |              |              |              |                        |                 |
| [TiNiO <sub>3</sub> ] O2.2  | 3.6 ±0.6 | 0.608 ±0.112 | -3.796       | 1.99±0.08    | 0.001±0.002            | 0.030           |
| [TiNiO <sub>3</sub> ] Ti0.1 | 0.6 ±0.1 | 0.608 ±0.112 | -3.796       | 2.74±0.07    | 0.001                  |                 |
| [TiNiO <sub>3</sub> ] Ni1.1 | 1.8±0.3  | 0.608 ±0.112 | -3.796       | 2.89±0.04    | 0.003                  |                 |
| [TiNiO <sub>3</sub> ] O2.3  | 1.8±0.3  | 0.608 ±0.112 | -3.796       | 3.72±0.34    | 0.003                  |                 |
| [TiNiO <sub>3</sub> ] Ti0.2 | 1.8±0.3  | 0.608 ±0.112 | -3.796       | 3.59±0.20    | 0.003                  |                 |



|                             |           |              |       |           |             |       |
|-----------------------------|-----------|--------------|-------|-----------|-------------|-------|
|                             |           |              |       |           |             |       |
| <b>NiT-2</b>                |           |              |       |           |             |       |
| [TiNiO <sub>3</sub> ] O2.2  | 4.1 ±0.2  | 0.692 ±0.039 | 2.514 | 2.06±0.01 | 0.001       | 0.004 |
| [TiNiO <sub>3</sub> ] Ti0.1 | 0.6 ±0.03 | 0.692 ±0.039 | 2.514 | 2.39±0.42 | 0.006±0.001 |       |
| [TiNiO <sub>3</sub> ] Ni1.1 | 2.0±0.1   | 0.692 ±0.039 | 2.514 | 2.94±0.04 | 0.001       |       |
| [TiNiO <sub>3</sub> ] O2.3  | 2.0±0.1   | 0.692 ±0.039 | 2.514 | 3.71±0.33 | 0.001       |       |
| [TiNiO <sub>3</sub> ] Ti0.2 | 2.0±0.1   | 0.692 ±0.039 | 2.514 | 3.39±0.01 | 0.009±0.002 |       |
| <b>NiT-3</b>                |           |              |       |           |             |       |
| [TiNiO <sub>3</sub> ] O2.2  | 5.7       | 0.95         | 0.590 | 2.07±0.01 | 0.009±0.001 | 0.005 |
| [TiNiO <sub>3</sub> ] Ti0.1 | 0.95      | 0.95         | 0.590 | 3.16±0.34 | 0.001       |       |
| [TiNiO <sub>3</sub> ] Ni1.1 | 2.85      | 0.95         | 0.590 | 2.90±0.03 | 0.002±0.001 |       |
| [TiNiO <sub>3</sub> ] O2.3  | 2.85      | 0.95         | 0.590 | 3.60±0.22 | 0.003       |       |
| <b>NiT-4</b>                |           |              |       |           |             |       |
| [TiNiO <sub>3</sub> ] O2.2  | 5.0±0.9   | 0.841±0.152  | 4.041 | 2.04±0.04 | 0.005±0.003 | 0.029 |
| [TiNiO <sub>3</sub> ] Ti0.1 | 0.8±0.1   | 0.841±0.152  | 4.041 | 2.83±0.01 | 0.001       |       |
| [TiNiO <sub>3</sub> ] Ni1.1 | 2.5±0.4   | 0.841±0.152  | 4.041 | 2.92±0.03 | 0.001       |       |
| [TiNiO <sub>3</sub> ] O2.3  | 2.5±0.4   | 0.841±0.152  | 4.041 | 3.60±0.22 | 0.003       |       |
| [TiNiO <sub>3</sub> ] Ti0.2 | 2.5±0.4   | 0.841±0.152  | 4.041 | 3.36±0.02 | 0.004       |       |

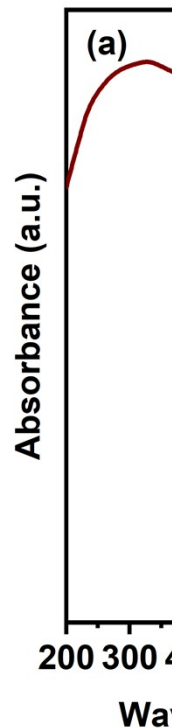

**Figure S7.** UV-Vis absorption spectra (a) and band gap (b) of pure NiO.

**Table S4.** The decay lifetimes and the average lifetime of photoexcited charge carriers in TiO<sub>2</sub> and NiT-3 calculated using tri-exponential decay equation.

| Parameters                     | Samples          |       |
|--------------------------------|------------------|-------|
|                                | TiO <sub>2</sub> | NiT-3 |
| $\tau_1$ (ns)                  | 0.48             | 1.49  |
| $\tau_2$ (ns)                  | 0.96             | 1.26  |
| $\tau_3$ (ns)                  | 1.94             | 7.59  |
| $\tau_{avg}$ (ns)              | 1.85             | 6.69  |
| $\chi^2$ (goodness of fitting) | 0.99             | 0.99  |

The average lifetime ( $\tau_{avg}$ ) can be estimated using the following equation S1:

$$\tau_{avg} = \frac{A_1\tau_1^2 + A_2\tau_2^2 + A_3\tau_3^2}{A_1\tau_1 + A_2\tau_2 + A_3\tau_3}$$

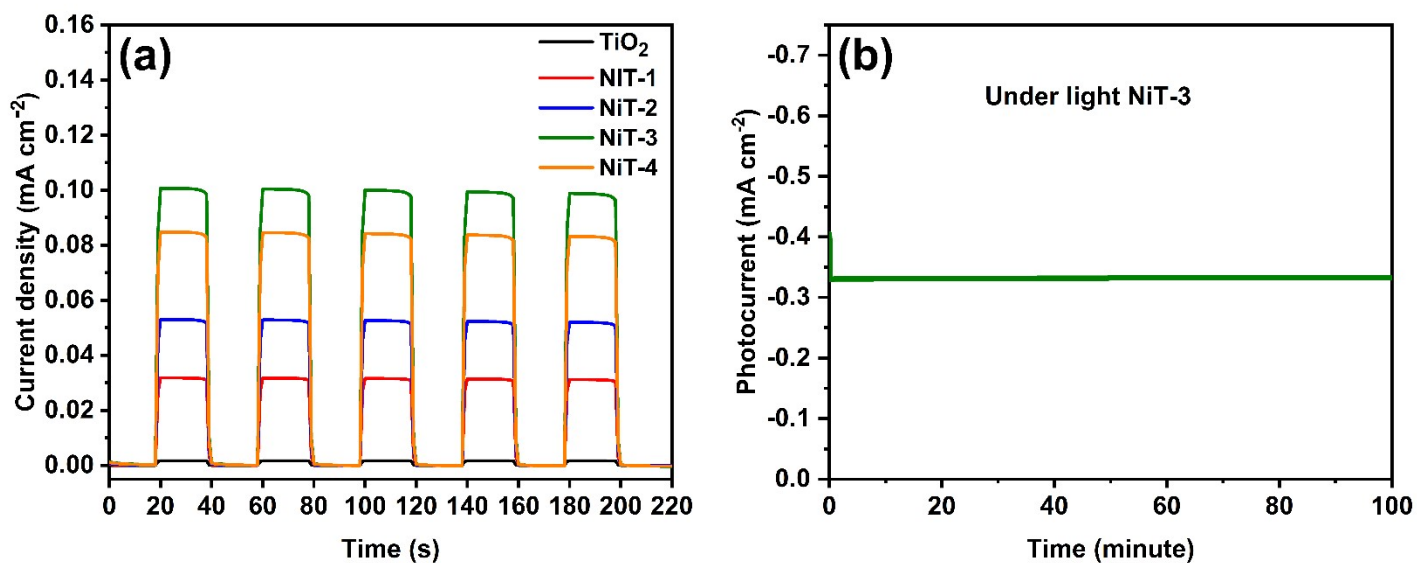

**Figure S8.** (a) Transient photocurrent density profiles of TiO<sub>2</sub> and NiT photoelectrodes in 0.1M glycerol + 1M KOH. (b) Photostability test for NiT-3 photoelectrode under continuous light illumination in 1M KOH.

**Table S5.** Fitting values of EIS parameters obtained for TiO<sub>2</sub> and NiT photoelectrodes.



| <b>Parameters</b>                                    | <b>TiO<sub>2</sub></b> | <b>NiT-1</b> | <b>NiT-2</b> | <b>NiT-3</b> | <b>NiT-4</b> |
|------------------------------------------------------|------------------------|--------------|--------------|--------------|--------------|
| <b>Solution Resistance (R<sub>s</sub>)/Ω</b>         | 0.80                   | 0.72         | 0.66         | 0.58         | 0.60         |
| <b>Double Layer Capacitance (C<sub>dl</sub>)/μF</b>  | 51.81                  | 91.23        | 134.56       | 451.95       | 181.44       |
| <b>Charge Transfer Resistance (R<sub>ct</sub>)/Ω</b> | 2010.86                | 1282.78      | 1080.15      | 270.90       | 743.55       |

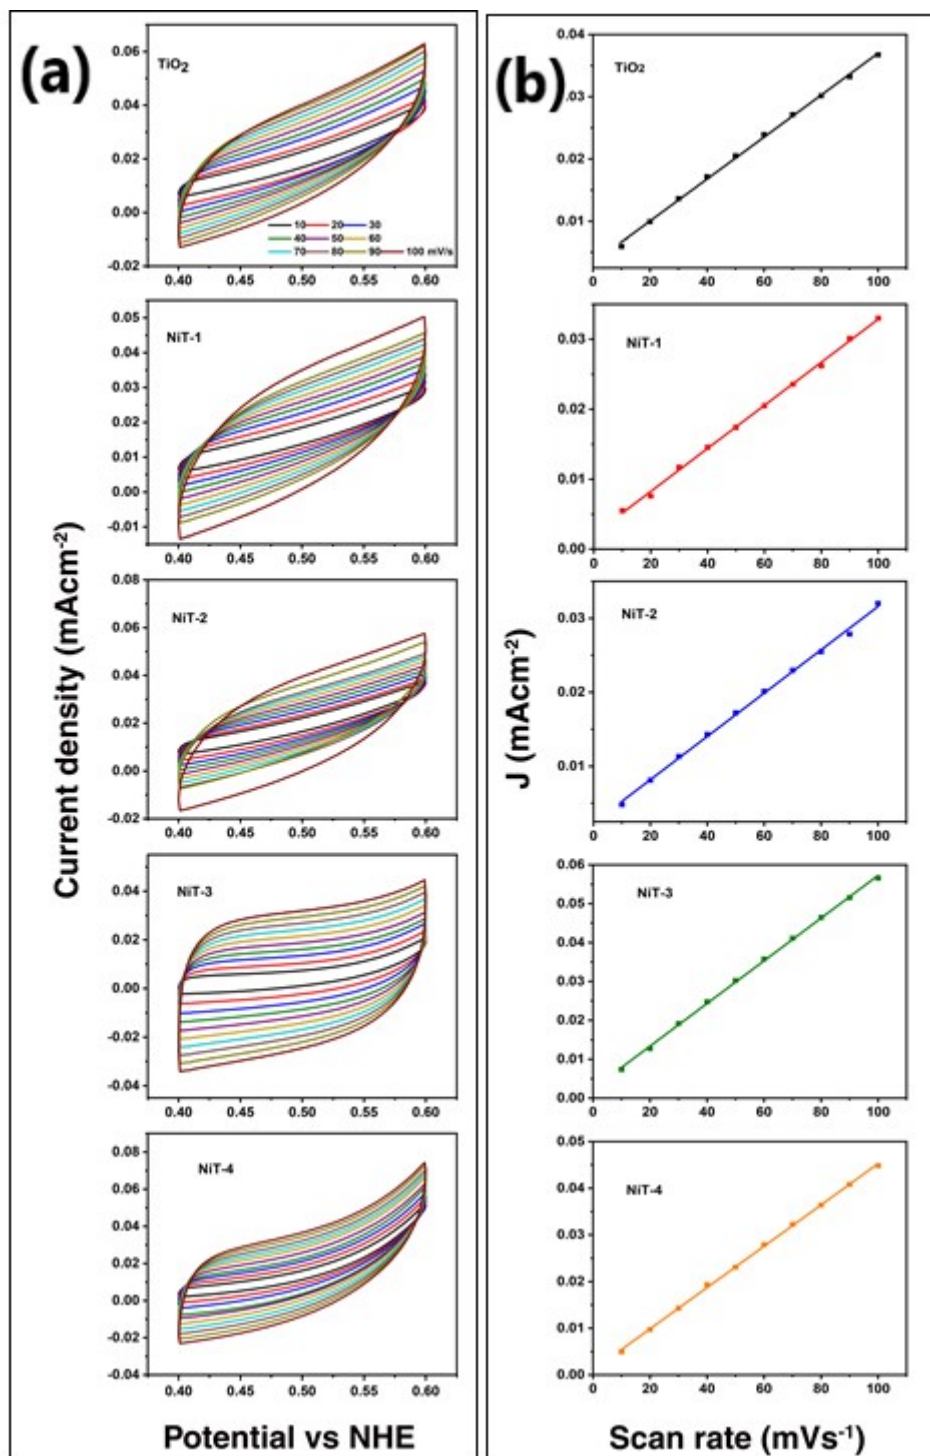

**Figure S9.** The Electrochemical capacitance measurements to determine the electrochemically active surface area (ECSA) of the catalysts in 1 M KOH. (a) The capacitive current density on TiO<sub>2</sub> and NiT nanocomposites from double layer charging can be obtained from cyclic voltammograms (CV) at different scan rates in the non-Faradic region. (b) The measured capacitive current ( $j$ ) was plotted as a function of scan rate to calculate double layer capacitance ( $C_{dl}$ ).

## Calculations of ECSA for TiO<sub>2</sub> and NiT nanocomposites

Double layer capacitance ( $C_{dl}$ ) was obtained by estimating half the value of slope between  $\Delta j$  at different Scan rates of 10 to 100 mVs<sup>-1</sup> in a non-Faradaic region between 0.4 and 0.6 V vs NHE.

For example, in the case of NiT-3,  $C_{dl}$  = 0.2808 mF

$C_s = 0.040 \text{ mFcm}^{-2}$  at 1M KOH<sup>1</sup>

Where  $\Delta j$  is change in capacitive current at different scan rates and  $C_s$  is specific capacitance.

$\text{ECSA} = C_{dl}/C_s = 0.2808/0.040$

$$= 7.02 \text{ cm}^2$$

**Table S6.** Calculated  $C_{dl}$  and ECSA values TiO<sub>2</sub> and NiT nanocomposites as obtained from **Figure S9**.

| Sl. No | Catalyst         | $C_{dl}$ (mFcm <sup>-2</sup> ) | ECSA (cm <sup>2</sup> ) |
|--------|------------------|--------------------------------|-------------------------|
| 1      | TiO <sub>2</sub> | 0.1202                         | 3.0                     |
| 2      | NiT-1            | 0.1538                         | 3.85                    |
| 3      | NiT-2            | 0.1685                         | 4.21                    |
| 4      | NiT-3            | 0.2808                         | 7.02                    |
| 5      | NiT-4            | 0.2214                         | 5.53                    |

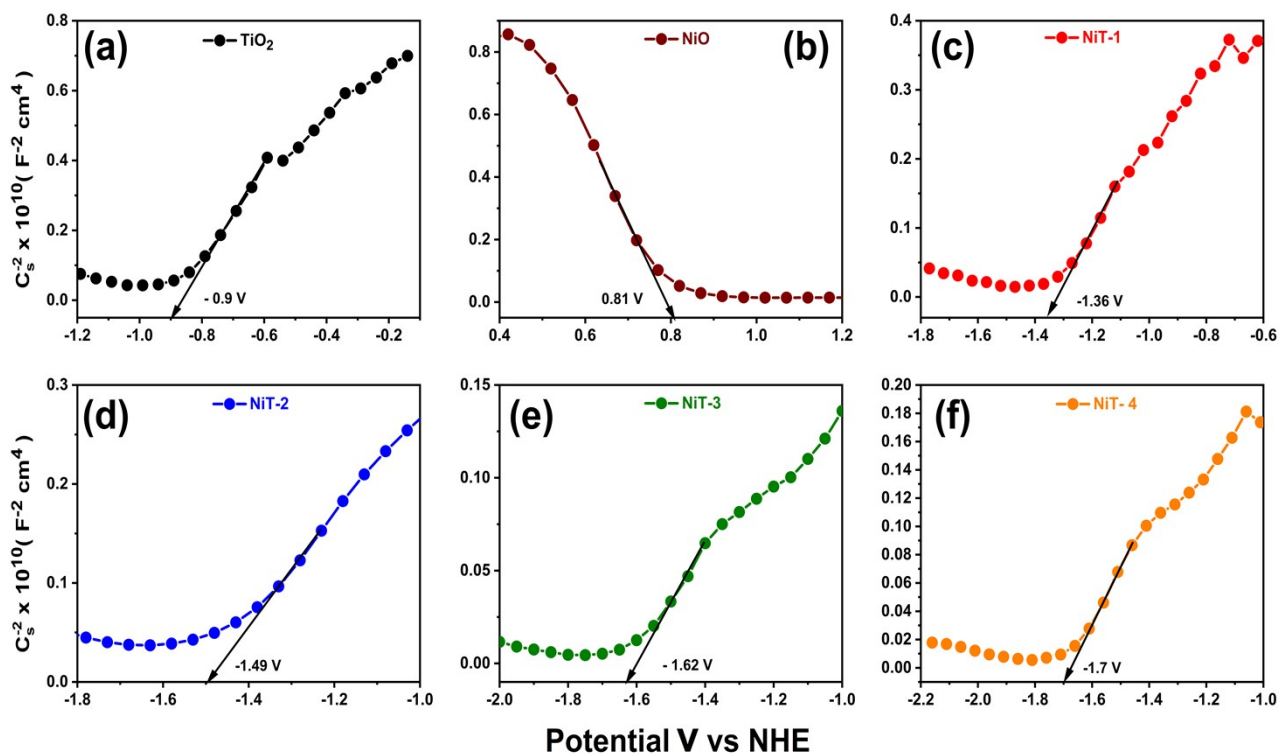

**Figure S10.** Mott-Schottky plots of TiO<sub>2</sub>, NiO and NiT nanocomposites.

The donor concentration of TiO<sub>2</sub> and NiT nanocomposites were calculated using MS equation (S2).<sup>2</sup>

$$\frac{1}{C_S^2} = \frac{2}{q\epsilon_r\epsilon_0 N_D} \left( V_{ap} - V_{fb} - \frac{k_B T}{q} \right) \quad (S2)$$

Where  $N_D$ ,  $q$ ,  $\epsilon_r$ ,  $\epsilon_0$ ,  $V_{ap}$ ,  $V_{fb}$ , and  $k_B T$  are the donor concentration/ the charge carrier density, electronic charge, the relative permittivity of semiconductor, permittivity of vacuum, applied potential, flat band potential and Boltzmann energy term, respectively. The  $k_B T$  term was negligible compared to other parameters and it was assumed that the values of  $q$ ,  $\epsilon_r$  and  $\epsilon_0$  are same for both TiO<sub>2</sub> and NiT nanocomposites.

**Table S7.** The apparent quantum yield (AQY) of TiO<sub>2</sub> and NiT nanocomposites calculated at different wavelengths (nm).

| Wavelength (nm) | AQY % of TiO <sub>2</sub> | AQY % of NiT-1 | AQY % of NiT-2 | AQY % of NiT-3 | AQY % of NiT-4 |
|-----------------|---------------------------|----------------|----------------|----------------|----------------|
| 410             | 0.12                      | 1.03           | 1.62           | 4.28           | 3.25           |
| 490             | 0.01                      | 0.65           | 1.05           | 2.26           | 1.53           |

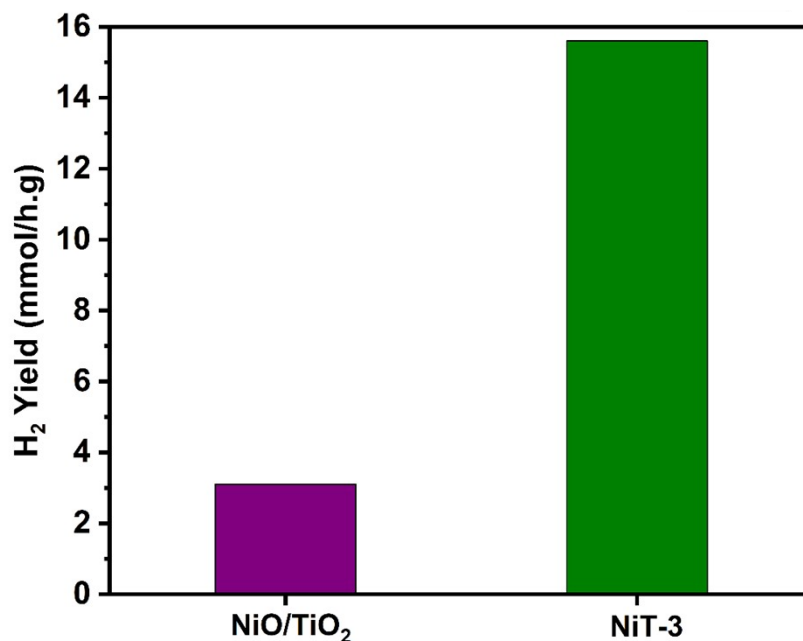

**Figure S11.** Comparison of photocatalytic H<sub>2</sub> production efficiency of thin film form of NiT-3 and NiO/TiO<sub>2</sub> prepared by traditional impregnation method with same Ni /Ti ratio as that of NiT-3. A five-fold higher H<sub>2</sub> production rate was obtained with NiT-3 compared to the catalyst prepared by the traditional method, which does not contain Ti<sup>3+</sup> indicating that Ti<sup>3+</sup> has a key role in the photocatalytic performance of NiT nanocomposites.

**Table S8.** Product analysis of glycerol oxidation in **anaerobic** and **aerobic** conditions under direct sunlight obtained over NiT-3.

| Product         | Anaerobic condition |                              |                | Aerobic condition |                              |                |
|-----------------|---------------------|------------------------------|----------------|-------------------|------------------------------|----------------|
|                 | Yield (mmol/g.h)    | Selectivity (%) <sup>#</sup> | Conversion (%) | Yield (mmol/g.h)  | Selectivity (%) <sup>#</sup> | Conversion (%) |
| Glycolaldehyde  | 1.17                | 51.1                         | 5              | 2.26              | 45.47                        | 11             |
| Formic Acid     | 0.32                | 13.97                        |                | 0.65              | 13.08                        |                |
| DHA             | 0.80                | 34.93                        |                | 2.06              | 41.45                        |                |
| CO <sub>2</sub> | ND                  | ND                           |                | 3.5               | NA                           |                |
| H <sub>2</sub>  | 15.62               | NA                           |                | 0.92              | NA                           |                |

#: Selectivity among the organic liquid products obtained by glycerol oxidation

**Table S9:** Product analysis of glycerol oxidation in **anaerobic** and **aerobic** condition under one sun condition obtained over NiT-3.

| Product         | Anaerobic condition |                              |                | Aerobic condition |                              |                |
|-----------------|---------------------|------------------------------|----------------|-------------------|------------------------------|----------------|
|                 | Yield (mmol/g.h)    | Selectivity (%) <sup>#</sup> | Conversion (%) | Yield (mmol/g.h)  | Selectivity (%) <sup>#</sup> | Conversion (%) |
| Glycolaldehyde  | 0.82                | 50.93                        | 3.5            | 1.35              | 46.88                        | 6              |
| Formic Acid     | 0.23                | 14.29                        |                | 0.55              | 19.1                         |                |
| DHA             | 0.56                | 34.78                        |                | 0.98              | 34.02                        |                |
| CO <sub>2</sub> | ND                  | ND                           |                | 1.78              | NA                           |                |
| H <sub>2</sub>  | 10.92               | NA                           |                | 0.65              | NA                           |                |

#: Selectivity among the organic liquid products obtained by glycerol oxidation

**Table S10.** No. of electrons used for the production of H<sub>2</sub> and no. of holes used for glycerol oxidation to liquid products (Glycolaldehyde, DHA and Formic acid) with NiT-3 under direct sunlight in anaerobic and aerobic conditions.

| Product        | Anaerobic condition      |                                                           |                                      | Aerobic condition        |                                                           |                                      |
|----------------|--------------------------|-----------------------------------------------------------|--------------------------------------|--------------------------|-----------------------------------------------------------|--------------------------------------|
|                | Concentration (mmol/g.h) | No. of e <sup>-</sup> /h <sup>+</sup> consumed (mmol/h.g) | e <sup>-</sup> /h <sup>+</sup> ratio | Concentration (mmol/g.h) | No. of e <sup>-</sup> /h <sup>+</sup> consumed (mmol/h.g) | e <sup>-</sup> /h <sup>+</sup> ratio |
| Hydrogen       | 15.62                    | 31.24                                                     | 7.8                                  | 0.92                     | 1.84                                                      | 0.26                                 |
| Glycolaldehyde | 1.17                     | 1.56                                                      |                                      | 2.26                     | 1.33                                                      |                                      |
| DHA            | 0.80                     | 1.60                                                      |                                      | 2.06                     | 4.12                                                      |                                      |
| Formic acid    | 0.32                     | 0.85                                                      |                                      | 0.65                     | 1.73                                                      |                                      |

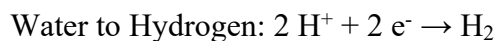

$n = 2$

4

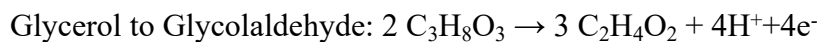

$n = 3$

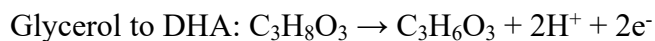

$n = 2$

8

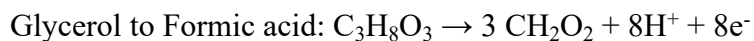

$n = 3$

where n means number of h<sup>+</sup> or e<sup>-</sup> to transform glycerol or water into a specific product.<sup>3</sup>



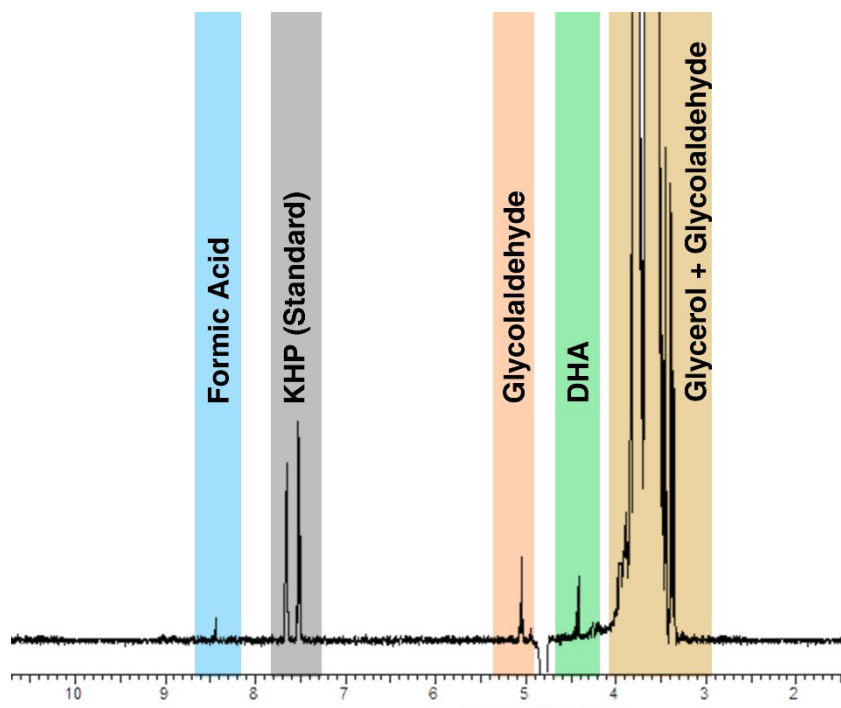

**Figure S12.** <sup>1</sup>H NMR spectra of the glycerol oxidation (water suppression sequence was performed): Using NiT-3 photocatalyst in anaerobic condition under direct sunlight.

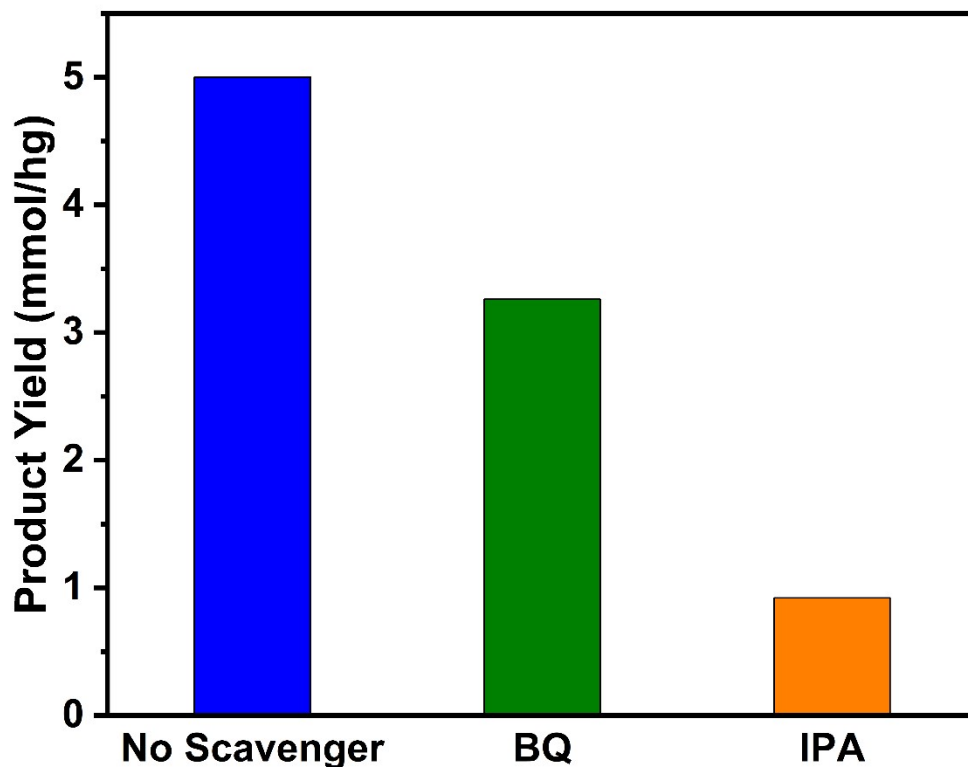

**Figure S13.** Influence of addition of scavengers, p-benzoquinone (BQ) and isopropanol (IPA) in the rate of photocatalytic oxidation of aqueous glycerol with NiT-3 nanocomposite in thin film form.

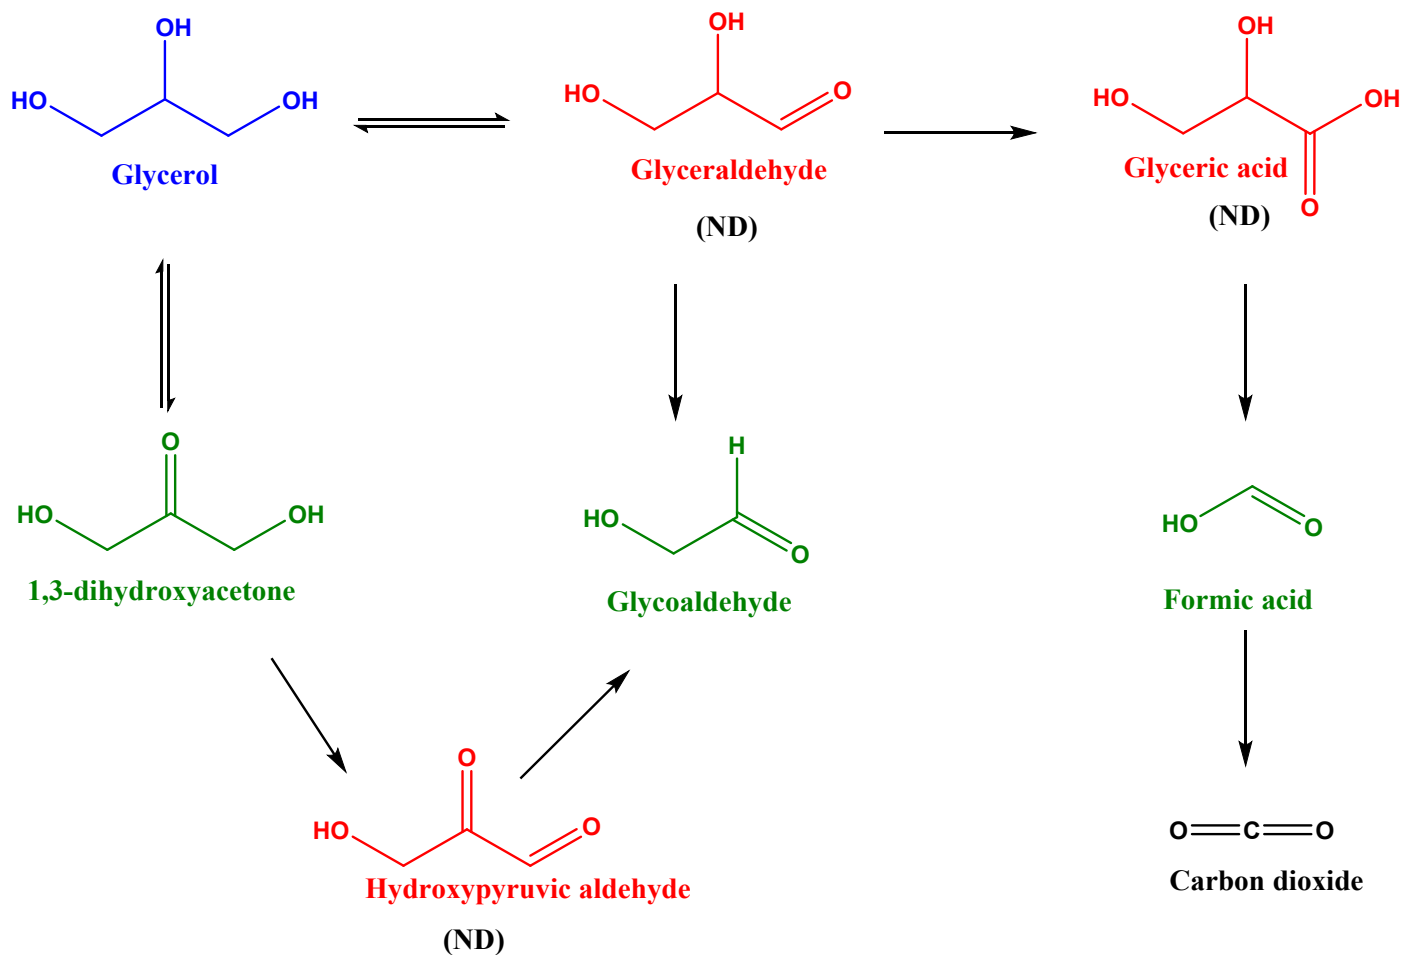

ND: Not Detected

**Figure S14:** Plausible reaction pathway for glycerol oxidation to value added products over NiT nanocomposites. Experimentally detected/measured products are shown in green and those compounds not observed is given in red.

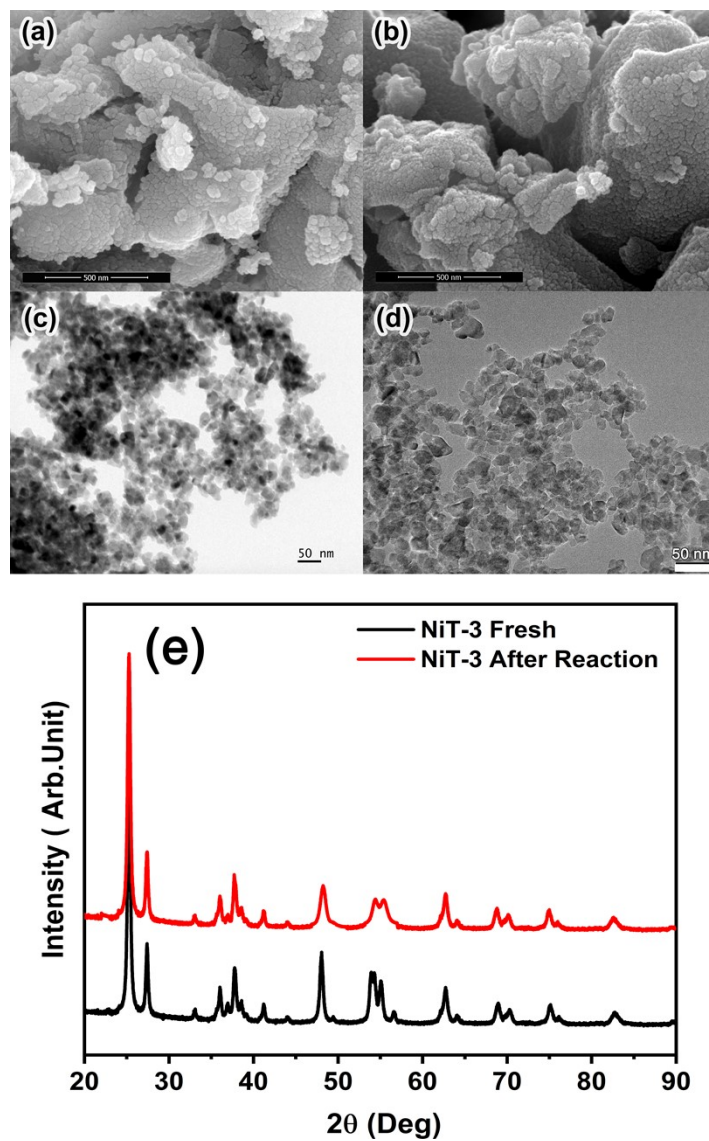

**Figure S15.** FESEM image of NiT-3 before (a) and after (b) recycling. TEM image of NiT-3 before (c) and after (d) recycling, and (e) comparison of PXRD patterns of fresh and spent NiT-3 sample.

**Table S11.** A summary of the H<sub>2</sub> yield reported from previous literature over various NiO species incorporated TiO<sub>2</sub> based photocatalysts in glycerol- water solution is compared with present work.

| Photocatalyst                                         | Light source                | H <sub>2</sub> Yield (mmolh <sup>-1</sup> g <sup>-1</sup> ) | Other products obtained                          | Reference    |
|-------------------------------------------------------|-----------------------------|-------------------------------------------------------------|--------------------------------------------------|--------------|
| NiO/TiO <sub>2</sub>                                  | 200 W Hg-Xe lamp            | 0.048                                                       | CO <sub>2</sub>                                  | 4            |
| NiO-TiO <sub>2</sub>                                  | 300 W Xenon lamp            | 8                                                           | Glyceraldehyde and dihydroxyacetone              | 5            |
| NiO <sub>x</sub> /TiO <sub>2</sub>                    | 500 W high-pressure Hg lamp | 0.9                                                         | CO, CO <sub>2</sub> and CH <sub>4</sub>          | 6            |
| NiO/TiO <sub>2</sub>                                  | 500 W high-pressure Hg lamp | 1.23                                                        | CO, CO <sub>2</sub> and CH <sub>4</sub>          | 7            |
| NiO/Ti <sup>3+</sup> -TiO <sub>2</sub> nanocomposites | Sunlight                    | 15.62                                                       | Dihydroxyacetone, glycolaldehyde and formic acid | Present work |

**S1:** Video for hydrogen generation from thin film form of NiT-3 in direct sunlight. Pl. see the video File in .mp4 format.

### Reference

- 1 M. Chauhan, K. Soni, P. E. Karthik, K. P. Reddy, C. S. Gopinath and S. Deka, *J. Mater. Chem. A*, 2019, **7**, 6985–6994.
- 2 B. Antil, L. Kumar, R. Ranjan, S. Shenoy, K. Tarafder, C. S. Gopinath and S. Deka, *ACS Appl. Energy Mater.*, 2021, **4**, 3118–3129.
- 3 Y.-H. Wu, D. A. Kuznetsov, N. C. Pflug, A. Fedorov and C. R. Müller, *J. Mater. Chem. A*, 2021, **9**, 6252.
- 4 S. P. Ramírez, J. A. Wang, M. A. Valenzuela, L. F. Chen and A. Dalai, *J. Appl. Res. Technol.*, 2020, **18**, 390–409.
- 5 M. Eisapour, H. Zhao, J. Zhao, T. Roostaei, Z. Li, A. Omidkar, J. Hu and Z. Chen, *J. Colloid Interface Sci.*, 2023, **647**, 255–263.
- 6 R. Liu, H. Yoshida, S. ichiro Fujita and M. Arai, *Appl. Catal. B Environ.*, 2014, **144**, 41–45.
- 7 S. ichiro Fujita, H. Kawamori, D. Honda, H. Yoshida and M. Arai, *Appl. Catal. B Environ.*, 2016, **181**, 818–824.
